25 **Abstract**

26 NR4A is a nuclear receptor protein family whose members act as sensors of cellular  
27 environment and regulate multiple processes such as metabolism, proliferation, migration,  
28 apoptosis, and autophagy. Since the ligand binding domains of these receptors have no  
29 cavity for ligand interaction, their function is most likely regulated by protein abundance  
30 and post-translational modifications. In particular, NR4A1 is regulated by protein  
31 abundance, phosphorylation, and subcellular distribution (nuclear-cytoplasmic  
32 translocation), and acts both as a transcription factor and as a regulator of other  
33 interacting proteins. SUMOylation is a post-translational modification that can affect protein  
34 stability, transcriptional activity, alter protein-protein interactions and modify intracellular  
35 localization of target proteins. In the present study we evaluated the role of SUMOylation  
36 as a posttranslational modification that can regulate the activity of NR4A1 to induce  
37 autophagy-dependent cell death. We focused on a model potentially relevant for neuronal  
38 cell death and demonstrated that NR4A1 needs to be SUMOylated to induce autophagic  
39 cell death. We observed that a triple mutant in SUMOylation sites has reduced  
40 SUMOylation, increased transcriptional activity, altered intracellular distribution, and more  
41 importantly, its ability to induce autophagic cell death is impaired.

42

43 **Summary Statement**

44 The modification of the nuclear receptor NR4A1 by SUMO regulates its transcriptional  
45 activity, intracellular localization and is required to induce autophagic cell death.

46

47 **Short title:** SUMOylated NR4A1 induces autosis

48

49 **Keywords:**

50 NR4A1, SUMO, autophagy, cell death, Substance P, NK<sub>1</sub>R

51

52 **Abbreviations list**

|    |                   |                                                                      |
|----|-------------------|----------------------------------------------------------------------|
| 53 | NR4A              | Nuclear receptor group family A                                      |
| 54 | NR4A1             | Nuclear receptor group 4 family A member 1 (Nur77, NGF1B, TR3, etc.) |
| 55 | NR4A2             | Nuclear receptor group 4 family A member 2 (Nurr1, NOT1, etc)        |
| 56 | NR4A3             | Nuclear receptor group 4 family A member 3 (Nor1, MINOR)             |
| 57 | SUMO              | small ubiquitin-like modifier                                        |
| 58 | SP                | Substance P                                                          |
| 59 | NK <sub>1</sub> R | Neurokinin 1 Receptor                                                |
| 60 | TAD               | Trans-Activation Domain                                              |
| 61 | DBD               | DNA Binding Domain                                                   |
| 62 | LBD               | Ligand Binding Domain                                                |
| 63 | PTM               | Post Translational Modifications                                     |

## 64 **Introduction**

65 Nuclear receptors are a superfamily of transcription factors involved in a vast number of  
66 biological processes. They share three common structural domains: a N-terminal  
67 transactivation domain (TAD), a central double zinc finger DNA binding domain (DBD) and  
68 a C-terminal ligand binding domain (LBD). Among the known human nuclear receptors,  
69 the ones belonging to the NR4A family act as sensors of the cellular environment and  
70 contribute to cell fate decisions, such as cell proliferation, differentiation, migration, cell  
71 death, etc. Physiologically, NR4A members influence the adaptive and innate immune  
72 system, angiogenesis, metabolism and brain function. The NR4A family is comprised of  
73 three members that bind the same DNA elements (1): NR4A1 (Nur77, TR3, NGF1B, etc.),  
74 NR4A2 (Nurr1, NOT, TINUR, etc.) and NR4A3 (Nor1, MINOR, etc.). NR4A family  
75 members are considered orphan nuclear receptors since endogenous ligands are  
76 unknown and, although several natural and artificial compounds enhance their  
77 transcriptional activity, they are able to activate transcription by solely up-regulating the  
78 expression of their genes (1). Therefore, rather than regulation by ligand interactions, their  
79 endogenous function is most likely regulated by NR4A family members protein abundance  
80 and post-translational modifications (PTM). All NR4A family members are mainly modified  
81 by phosphorylation by over 20 different kinases described so far, and at least NR4A1 is  
82 also acetylated by CBP/p300 and deacetylated by HDAC1. Specific PTM affect their  
83 interaction with either DNA or other proteins, as well as their intracellular localization (1).

84 A wide variety of stimuli induces the expression of *Nr4a* genes, both during  
85 development and in adulthood. For example, they are induced in response to caloric  
86 restriction (2), exercise (3) or during learning and long term memory (4, 5). NR4A family  
87 proteins regulate the expression of several genes, some of which are involved in lipid and  
88 glucose metabolism, insulin sensitivity and energy balance. Another important function of  
89 NR4A family proteins is to prevent DNA damage and to promote DNA repair (6, 7). NR4A1

90 also has non-genomic activities both in the nucleus and in the cytoplasm, altering the  
91 function of interacting proteins. For all the functions described above, understanding the  
92 molecular regulation of NR4A activity is an active area of research.

93 Autophagy is mainly a catabolic process that allows cells to recycle  
94 macromolecules when needed or to eliminate damaged proteins and organelles, among  
95 other components, contributing to cell health (8); occasionally, however, it also contributes  
96 to an alternative secretion mechanism (9) or even to cell death (10). When inhibition of  
97 autophagy prevents cell death, it is referred to as autophagic cell death, although the  
98 actual cause of cell death still needs to be understood. We found previously that NR4A1  
99 plays an essential role in a form of cell death induced by several stimuli that is non-  
100 apoptotic (in apoptosis-competent cells) and is dependent on autophagy. NR4A1  
101 inactivation by either over-expression of dominant negative mutants or by RNAi prevents  
102 cell death, and inhibition of autophagy either pharmacologically or by RNAi to reduce  
103 autophagic gene expression also prevents cell death (11-13). Hence, NR4A1 mediates  
104 autophagic cell death, a phenomenon that was subsequently confirmed by others. In the  
105 case of melanoma cells treated with THPN, a chemical compound targeting NR4A1, cell  
106 death occurs after induction of excessive mitophagy, due to NR4A1 translocation to the  
107 inner membrane of the mitochondria, causing dissipation of mitochondrial membrane  
108 potential by the permeability pore complex ANT1/VDAC (14). Furthermore, Dendrogenin  
109 A, a mammalian cholesterol metabolite ligand of liver-X-receptors (LCRs) induces *Nr4a1*  
110 expression in association with excessive autophagic cell death both *in vitro* and *in vivo*  
111 (15, 16), displaying anticancer and chemopreventive properties in mice(17). Interestingly,  
112 NR4A1 interaction with anti-apoptotic BCL2 family members outside the BH3 domain  
113 induces autophagic cell death (18), which seems to be mediated by releasing BECN1 in a  
114 model of cigarette smoke-induced autophagic cell death(19). Taken together, these  
115 findings indicate that NR4A1 could function as a broad inducer of autophagic cell death.

116 Some authors have coined autophagic cell death as autosis (20); we will use this term  
117 hereafter for simplicity, although whether NR4A1-induced autophagic cell death is  
118 mediated by Na<sup>+</sup>,K<sup>+</sup>- ATPase pump, as has been documented for autosis, has not been  
119 addressed.

120 In the present work we aimed to study whether specific PTM confer upon NR4A1  
121 the ability to induce autosis, by using our already described model of NR4A1-mediated  
122 autosis, induced upon Substance P (SP) binding to its NK<sub>1</sub>R receptor (here referred to as  
123 SP/NK<sub>1</sub>R-induced autosis). SP is a neuropeptide involved in several physiological  
124 functions and pathological situations, including emotional behavior, pain perception,  
125 addiction, inflammation, neurodegeneration, etc. Accordingly, NK<sub>1</sub>R is expressed all  
126 around the body, including endothelial cells and in both central and peripheral nervous  
127 system, and SP is present in all body fluids such as cerebrospinal fluid, blood, etc. (21).  
128 We focused in this model for its relevance in neuronal cell death, as interfering with SP  
129 signaling reduces infarct volume and neuronal cell death in *in vivo* models of ischaemia  
130 (22) and of excitotoxin-induced seizures (23), both situations in which NR4A1 expression  
131 is also induced (*i.e.* ischaemia (24) and kainic acid-triggered seizures (25)).

132 During SP/NK<sub>1</sub>R-induced autosis, NR4A1 is regulated by both protein abundance  
133 and phosphorylation (12), and undergoes nuclear-cytoplasmic translocation (13),  
134 potentially having both genomic and non-genomic functions. A previous report showed  
135 that NR4A1 undergoes sequential SUMOylation and ubiquitination, which together control  
136 the degradation of NR4A1 after induced stress (26). SUMO modification can affect protein  
137 stability, transcriptional activity, protein-protein interactions and intracellular localization of  
138 target proteins (27). In addition, SUMO modification affects numerous cellular processes  
139 overlapping with those described for NR4A1 function, both in development and adulthood.  
140 Even though the SUMO machinery is mainly located in the nucleus, numerous cytoplasmic  
141 proteins have also been identified to have their function modulated by SUMO modification

142 (28, 29). Therefore, we hypothesize that NR4A1 might be SUMOylated in response to  
143 SP/NK<sub>1</sub>R signaling, conferring upon it the ability to induce autosis.

144 SUMOs are small ubiquitin-related peptides, approximately 11 KDa size, that  
145 become conjugated to a variety of proteins and are deconjugated by SUMO-specific  
146 proteases. Despite the name, SUMO shares less than 20% homology with ubiquitin. The  
147 similarity is more significant in the biochemical mechanism of ligation, as it involves three  
148 conjugating enzymes: E1, a dimer known as SAE1/SAE2; E2, a protein named UBC9; and  
149 E3, which are a group of proteins conferring target specificity. There are four genes in  
150 mammals coding for four SUMO peptides (SUMO1-4). SUMO2 and 3 share 95%  
151 homology and there are no antibodies that distinguish between them, so they are referred  
152 to as SUMO2/3; they are only 50% identical to SUMO1 (reviewed in (30)).

153 NR4A1 is an early response gene, whose expression is induced in minutes, and the  
154 protein is degraded after a couple of hours. However, we observed that NR4A1 expression  
155 is sustained during SP/NK<sub>1</sub>R-induced autosis, suggesting that in this scenario NR4A1  
156 protein would scape degradation. In this work, we confirmed that NR4A1 is indeed  
157 SUMOylated during SP/NK<sub>1</sub>R-induced autosis, and mutants with reduced SUMOylation  
158 showed increased transcriptional activity and altered intracellular distribution. More  
159 importantly, the ability to promote SP/NK<sub>1</sub>R-induced autosis was impaired when  
160 SUMOylation of NR4A1 was reduced.

161

## 162 **Experimental Methods**

163 *Cell culture, plasmid transfection and cell death evaluation.*

164 Human embryonic kidney 293 (HEK293) cells were grown in high glucose DMEM  
165 (Invitrogen, Carlsbad, CA) supplemented with 10% fetal bovine serum (Sigma, St. Louis,  
166 MO) and penicillin/streptomycin 100 U/ml (Invitrogen, Carlsbad, CA). The cultures were  
167 incubated at 37°C in 95% air and 5% carbon dioxide with 95% humidity. Transient

168 transfection was performed with Polyethylenimine (PEI, 25 kDa Polysciences Inc. # 23966-  
169 2) mixed with DNA in a 3:1 ratio. Briefly,  $2 \times 10^5$  cells/well were seeded into 35 mm wells  
170 16-20 hr prior to transfection. Transfection solution: 1  $\mu$ g of DNA was diluted into 75  $\mu$ l  
171 OPTIMEM; 3  $\mu$ g PEI was diluted into 75  $\mu$ l OPTIMEM; then mixed and incubated for 15  
172 minutes at room temperature. 0.5 ml of medium was removed from each well and the  
173 mixture was added dropwise to the cells. After 4 hr at 37 °C the medium was refresh  
174 supplemented without antibiotics. After 24 hr, 100 nM SP (SIGMA) was added when  
175 necessary. Expression of each construct in the transient transfections was determined by  
176 Western blot or immunofluorescence. Transient transfection efficiencies were in all cases  
177 >80%. The plasmid pcDNA3.1-NK<sub>1</sub>R has previously been described (11, 31). Dr. Jacques  
178 Drouin (Laboratoire de Génétique Moléculaire, Institut de Recherches Cliniques de  
179 Montréal, Canada) kindly provided POMC-Luc, NBRE-POMC-Luc and NuRE-POMC-Luc  
180 reporter plasmids. Site-directed mutagenesis was performed using QuickChange Kit  
181 (Invitrogene). The alignment and prediction of consensus motifs was performed using  
182 Clustal W2 software, using the sequence UniProtKB - P22736 (NR4A1\_HUMAN). All  
183 position information refers to this entry. Cell death was determined by Trypan blue  
184 exclusion or LDH release. The software PRISM 6.0 (GraphPad Software, La Jolla, CA,  
185 USA) was used for the one-way ANOVA statistical analysis, and the p values between  
186 indicated treatments in figures were calculated by Bonferroni's Multiple Comparison Test.

### 187 **Western blot, immunoprecipitation and immunofluorescence analysis.**

188 For Western blotting, the transfected human embryonic kidney 293 cells were washed with  
189 cold PBS and homogenized in lysis buffer (150  $\mu$ M NaCl, 1% Triton X-100, 50  $\mu$ M Tris HCl  
190 pH 8.0, proteinases inhibitor cocktail cOmplete ULTRA and phosphatases inhibitor cocktail  
191 PhosSTOP (Roche Diagnostic Corporation, Indianapolis, IN, USA)). Cytoplasmic extracts  
192 were collected after 10 min. centrifugation at 14,000 rcf. Protein was quantified by  
193 Bradford assay and electrophoresis of equal amounts of total protein was performed on



194 SDS-polyacrylamide gels. Separated proteins were transferred to polyvinylidene fluoride  
195 membranes at 4° C. Membranes were probed with the following antibodies: SUMO1  
196 (1:1000 #4930), SUMO2/3 (1:1000 #4971), phospho-Threonine (1:500 #9381), Myc (1:350  
197 #2276) and NR4A1 (1:2000 #3960) from Cell Signaling Technology Inc., Danvers, MA,  
198 USA; GAPDH (1:8000, Research Diagnostics, Flanders, NJ, USA); TUBULIN (1:7000,  
199 Abcam, Cambridge, MA, USA); FLAG (1:1000, #F3165 SIGMA, San Luis, Missouri, USA);  
200 UBC9 (1:250, #610748 BD Biosciences, San Jose, CA); UBIQUITIN (1:1000, #U5379  
201 SIGMA, San Luis, Missouri, USA); HA (#H6908 SIGMA, San Luis, Missouri, USA). The  
202 membranes were incubated in the appropriate horseradish peroxidase-coupled secondary  
203 antibody for 1 hr followed by enhanced chemiluminescence detection (Amersham,  
204 Arlington Heights, IL). Alternatively, appropriate infrared dye-coupled secondary antibodies  
205 (1:10,000 dilution of anti-rabbit IRDye800 and anti-mouse IRDye700, Rockland,  
206 Gilbertsville, PA, USA) were used and the blots were scanned in an Odyssey Imager (LI-  
207 COR Biosciences, Lincoln, Nebraska, USA). The immunoprecipitations were carried out  
208 using super-paramagnetic Microbeads conjugated to protein A or protein G, following the  
209 manufacturer's instructions (MACS; Milteyi Biotec, Auburn, CA). For immunofluorescence,  
210 cells were seeded into Lab-Tek CC2 treated slide chambers (Nalgene Nunc International,  
211 Naperville, IL, USA); after washing with PBS cells were fixed with 4%  
212 paraformaldehyde/PBS for 10 min; then washed with PBS and permeabilized with 0.2%  
213 Triton X-100/PBS for 10 min. Afterwards cells were washed with PBS, pre-incubated 30  
214 min with 4% BSA/PBS and 4% goat serum and washed again with PBS. Anti-NR4A1 (M-  
215 210 Santa Cruz Biotechnology, Santa Cruz, CA, USA) was diluted 1:200 in 2%BSA/PBS  
216 and incubated over night at 4°C. After washing with PBS cells were incubated with anti-  
217 rabbit coupled to Alexafluor 594 (Invitrogen, Carlsbad, CA) diluted 1:1000 in 2%BSA/PBS  
218 for 30 min at room temperature. Then, cells were treated with 10mg/ml RNAse for 30 min  
219 at 37°C and washed again with PBS. Cells were counterstained with 10 ng/ml DAPI and

220 mounted for microscope observation on an Axiovert 200M (Carl Zeiss) confocal  
221 microscope.

222

## 223 **RNAi**

224 Four regions were targeted for 3'UTR hNR4A1 mRNA (GenBank NM\_002135) starting at  
225 positions: 2383 5'gcgccgugcuguaaaauaaguu3'; 2401 5' gccagugcugcuguaaaauuu3'; 2529  
226 5'ccacauguacauaaacuguuu3'; 2535 5'guacauaaacugucacucuuu3'. The corresponding  
227 siRNAs were simultaneously transfected. These siRNAs were purchased as SMARTpool  
228 from Dharmacon (Lafayette, CO, USA). Control siRNA targeting a protein of Rotavirus  
229 was a kind gift from Dr. Susana López (Instituto de Biotecnología, UNAM).

230 siRNA transfection: Human embryonic kidney 293 cells ( $10^5$  cells per well in 12-well  
231 plates) were grown in high-glucose DMEM supplemented with 10% fetal bovine serum  
232 (Sigma, St. Louis, MO), with no antibiotics for 16 hr. The siRNA specific for each target  
233 gene was transfected with Lipofectamine 2000 reagent (Invitrogen, Carlsbad, CA, USA)  
234 according to the manufacturer's instructions, using 3  $\mu$ g siRNA: 6  $\mu$ l Lipofectamine 2000  
235 ratio. After 4 hr of incubation, plasmids were transfected.

236

## 237 **Transcription Assays**

238 Human embryonic kidney 293 cells were seeded in 24-well plates ( $1 \times 10^5$  cells/well).  
239 Transient transfections were performed with 2.1  $\mu$ g PEI plus 700 ng DNA [225 ng NK<sub>1</sub>R;  
240 225 ng reporter plasmid (POMC minimal promoter-Luciferase that lacks responsive  
241 elements, NBRE-Luciferase or NurRe-Luciferase); 225 ng NR4A1 (or mutants) and 25 ng  
242 of a plasmid encoding Renilla luciferase to normalize transfections]. Twenty-four hours  
243 after transfection, the cells were incubated or not with 100 nM SP for 3 h. Luciferase and  
244 Renilla activities were determined using the Dual-Luciferase Reporter Assay (Promega

245 #E1980), according to manufacturer's instructions and a FLUOstar OMEGA luminometer  
246 (BMG LABTECH).

247

## 248 **Results**

249 **NR4A1 is SUMOylated during SP/NK<sub>1</sub>R-induced autosis upon previous**  
250 **phosphorylation.**

251 SUMO peptides are conjugated to a Lys residue, frequently within a consensus motif  
252  $\Psi$ KXE, where  $\Psi$  represents any hydrophobic residue and X any amino acid(30). It has  
253 been shown that NR4A2 is SUMOylated in two motifs conserved among the family  
254 members that lead to SUMO ligation to lysines K91 (32) or K558 (33), depending on the  
255 cell context. In order to find additional potential SUMOylation sites also conserved in the  
256 three members of the family, we aligned NR4A protein sequences and searched for the  
257 SUMO consensus motif  $\Psi$ KXE. We identified K102 and K577 within a SUMO motifs, which  
258 are indeed SUMOylated (26), and observed that K558 is conserved in NR4A1 and NR4A2,  
259 and hence it is also a potential site for SUMOylation in NR4A1 (positions numbers refer to  
260 the human canonic sequence UniProtKB P22736) (Figure 1A).

261 To analyze NR4A1 SUMOylation during SP/NK<sub>1</sub>R-induced autosis, we  
262 immunoprecipitated NR4A1 at different time points after SP exposure and looked for  
263 SUMO1 or SUMO2/3 conjugation by Western blot. Starting at 3 hr after SP induction, a  
264 fraction of NR4A1 was SUMOylated by SUMO1 and the modification lasted up to 12 hr, a  
265 time point at which SUMO2/3 ligation was also observed (Figure 1B). We verified that  
266 SUMO peptide conjugation of NR4A1 occurs during SP/NK<sub>1</sub>R-induced autosis by over-  
267 expressing Myc-tagged SUMO1 (Figure 1C) or HA-tagged SUMO2 (Figure 1D). To study  
268 the role of SUMOylated NR4A1 we substituted the three lysine residues expected to be  
269 modified by SUMO (K102, K558 and K577) for arginine. First, we evaluated whether the  
270 triple NR4A1\_K102,558,577R mutant (named TriMut) had reduced SUMOylation in

271 comparison to the level determined in NR4A1 wild type. We immunoprecipitated FLAG-  
272 NR4A1 wild type or FLAG-NR4A1\_TriMut and looked for the presence of SUMO2 by  
273 Western blot. Indeed, NR4A1\_TriMut showed reduced SUMOylation (Figure 1D), although  
274 additional Lys residues seem to be also modified by SUMO, as a weak signal was still  
275 detected.

276 There are several examples of crosstalk between phosphorylation and  
277 SUMOylation, having phosphorylation both positive and negative regulation over SUMO  
278 modification (34). During SP/NK<sub>1</sub>R-induced autosis NR4A1 is phosphorylated by ERK2,  
279 which is necessary for autosis induction, as the inhibition of MEK2 and ERK2 (but not the  
280 inhibition of MEK1 or ERK1) prevents NR4A1 phosphorylation and SP/NK<sub>1</sub>R-induced  
281 autosis (12). Accordingly, NR4A1 is phosphorylated *in vitro* by ERK2 but not by ERK1 in  
282 threonine 143 (35). Therefore, we mutated T143 to alanine, expecting to abolish its  
283 phosphorylation. Indeed, T143 is phosphorylated during SP/NK<sub>1</sub>R-induced autosis, since  
284 mutant NR4A1\_T143A had reduced phosphorylation level as compared to NR4A1 wild  
285 type (Figure 2A). Nevertheless, a weak signal was still observed, indicative of an additional  
286 phosphorylated threonine. We found two additional ERK consensus motifs in the NR4A1  
287 sequence (Figure 1A), although additional phosphorylation sites could be targeted by  
288 other kinases.

289 To analyze whether SUMO conjugation influences phosphorylation, we studied the  
290 level of phosphorylation when SUMOylation is reduced. As shown in Figure 2A, the level  
291 of phosphorylation on threonine residues was not affected in NR4A1\_TriMut. This result  
292 indicates that phosphorylation is not affected by SUMOylation in this case. On the other  
293 hand, SUMOylation resulted dependent on previous phosphorylation in T143, as  
294 NR4A1\_T143A was barely SUMOylated (Figure 2B). Therefore, NR4A1 SUMOylation,  
295 subsequent to phosphorylation, could alter NR4A1 stability and/or intracellular distribution  
296 and, consequently, the ability to induce autosis.

297 In previous work we observed that *Nr4a1* expression is induced by SP signaling  
298 (12), but NR4A1 protein abundance cannot be explained by transcriptional regulation  
299 alone. We noticed that NR4A1 produced by expression of its cDNA (lacking both 5' and 3'  
300 UTR) from a viral promoter (CMV) that lacks endogenous regulatory regions, also  
301 accumulates in response to SP/NK<sub>1</sub>R (for example, look at Figure 2A, Input). We  
302 rationalized then that NR4A1 stability should be post-translationally regulated. MAPK  
303 signaling activated by SP/NK<sub>1</sub>R does not affect NR4A1 abundance, as it still accumulates  
304 when ERK2 signaling is inhibited (12). SUMO modification commonly enhances protein  
305 stability by binding to lysine residues that otherwise would be ubiquitinated, targeting the  
306 protein for proteasome degradation; nevertheless, it has also been observed that some E3  
307 ubiquitin ligases, such as RNF4, which have both SIM (SUMO interacting motif) and RING  
308 domains, attach ubiquitin to SUMO-modified proteins (30), and this mechanism has been  
309 described to occur to NR4A1(26). Therefore, we asked whether NR4A1 SUMOylation  
310 regulated NR4A1 stability during SP/NK<sub>1</sub>R-induced autosis. First, we determined the  
311 endogenous NR4A1 half-life. NR4A1 reached a maximum level of expression 3 hr after SP  
312 exposure and by 9 hr it was still detected but clearly reduced (Figure 2C). We then  
313 inhibited new protein synthesis (with cycloheximide) after 3 hr of induction with SP (to start  
314 with the highest amount of NR4A1), and observed that NR4A1 was degraded very rapidly,  
315 as 3 hr after cycloheximide addition it was no longer detected (Figure 2C).

316 To compare the half-life of wild type NR4A1 with NR4A1\_TriMut with reduced  
317 SUMOylation, we tagged it with FLAG, and compared FLAG-NR4A1 wild-type half-life with  
318 FLAG-NR4A1\_TriMut (which allowed to distinguish NR4A1\_TriMut from endogenously  
319 induced NR4A1). Since these constructs are expressed from a strong constitutive  
320 promoter (CMV), FLAG-NR4A1 started in these experiments with a higher amount of  
321 protein than the endogenously-induced NR4A1, therefore its expression could be  
322 observed it for a longer period of time. We inhibited new protein synthesis 24 hr after

323 transfection. Notably, the stability imposed by SP signaling still occurred in FLAG-tagged  
324 NR4A1 (Figure 2D, upper panel). Under basal expression SUMOylation seemed to indeed  
325 contribute to NR4A1 stability, as the half-life of TriMut (which was SUMOylated to a lesser  
326 degree) was clearly reduced compared to wild type. Surprisingly, however, TriMut  
327 abundance still increased in response to SP (Figure 2D, bottom panel) reducing its  
328 degradation rate. Other reports describe that NR4A1 stability can be modulated by  
329 acetylation, which also occurs at Lys residues. We looked for acetylation during SP/NK<sub>1</sub>R-  
330 induced autosis, but no difference was found in the level of acetyl-Lysine content in  
331 immunoprecipitated NR4A1 from non-treated cells compared with SP treated cells (data  
332 not shown). We do not know at this point which mechanism mediates the increase in  
333 NR4A1 stability in response to SP signaling but, possibly, the remaining SUMOylation  
334 sites observed in TriMut (Figure 1D) could be involved.

335

336 **SUMOylation and phosphorylation alter NR4A1 transcriptional activity and**  
337 **intracellular distribution.**

338 SUMO modification of transcription factors usually inhibits their transcriptional activity,  
339 either by recruiting corepressors to promoter regions or by sequestering the SUMOylated  
340 form in nuclear bodies (36). NR4A1 transcriptional activity could also be negatively  
341 regulated by SUMOylation, since NR4A1 interacts with HDAC1, potentially recruiting  
342 corepressor complexes (1), and with PML, being potentially recruited into nuclear bodies  
343 (37). In previous studies we found that NR4A1 is transcriptionally active during SP/NK<sub>1</sub>R-  
344 induced autosis (13). Therefore we analyzed whether the transcriptional activity of NR4A1  
345 is increased in the triple mutant in which predicted Lys targets of SUMOylation were  
346 replaced by arginine. NR4A receptors bind as monomers to the DNA element NBRE or as  
347 homo- or heterodimers to the DNA element NuRE. The experiments shown were  
348 performed with NuRE. First, we verified that SUMO NR4A1 mutant maintains basal

349 transcriptional activity, and then we compared its transcriptional activity with that of NR4A1  
350 WT in response to SP. As can be seen in Figure 3A, NR4A1\_TriMut showed enhanced  
351 transcriptional activity in response to SP signaling. Therefore, SUMOylation appears to be  
352 a relevant negative regulator of NR4A1 transcriptional activity.

353 NR4A1 can have both nuclear and cytoplasmic functions(15); during SP/NK<sub>1</sub>R-  
354 induced autosis around 15% of the cells showed NR4A1 also in the cytoplasm (13). To  
355 assess whether SUMOylation affects NR4A1 localization, we analyzed the intracellular  
356 distribution of the TriMut. In accordance with the higher level of transcriptional activity we  
357 observed, the TriMut was more frequently retained in the nucleus. We also tested the  
358 mutant in the target of phosphorylation T143, as it has been previously reported that  
359 phosphorylation of NR4A1 also modulates its localization, although in response to other  
360 kinases and phosphorylated in other sites (38). We compared NR4A1\_T143A and  
361 NR4A1\_T143D, phosphorylation-defective and threonine phosphorylation-mimic (D mimics  
362 the negative charge provided by phosphorylation) mutants, respectively. While most of the  
363 cells have NR4A1 restricted to the nucleus, again we observed a small proportion (18%) of  
364 cells with NR4A1 also in the cytoplasm (Figure 3B). It appears then than SUMOylation  
365 regulates the exportation of NR4A1 out of the nucleus, while phosphorylation might be  
366 necessary for retaining NR4A1 in the nucleus. A fine regulation of combined PTMs could  
367 determine the intracellular distribution of NR4A1.

368

### 369 **NR4A1 SUMOylation is necessary for SP-induced autosis**

370 We hypothesized that the signaling pathway activated upon NK<sub>1</sub>R activation by SP binding  
371 triggers SUMOylation of NR4A1, conferring upon it the ability to induce autosis instead of  
372 apoptosis or proliferation, among other processes. To inhibit NR4A1 SUMOylation we  
373 expressed GAM1, a viral protein that inhibits SUMOylation by promoting SAE1/SAE2 and  
374 UBC9 degradation (39). As shown in Figure 4A, in the presence of GAM1, but not of an

375 inactive GAM1 mutant, the amount of SUMOylated NR4A1 was reduced. Supporting the  
376 notion that SUMOylation increases its basal stability, the total amount of NR4A1 was also  
377 reduced in the presence of GAM1. More significantly, *Gam1* expression completely  
378 prevented SP/NK<sub>1</sub>R-induced autosis (Figure 4B).

379 Finally, to confirm whether SUMOylation of NR4A1 is indeed necessary to mediate  
380 SP-induced autosis, we tested the ability of TriMut to induce autosis in response to SP. To  
381 eliminate endogenous expression of NR4A1 that could mask the mutant phenotype, we  
382 silenced it by targeting small interfering RNAs to the 3' untranslated region of NR4A1  
383 mRNA, which is absent in the NR4A1 expression vector. As expected, silencing the  
384 expression of endogenous NR4A1 reduced cell death in response to SP, which was  
385 restored by the expression of NR4A1 WT but not by the expression of TriMut (Figure 4C).  
386 Therefore, SUMOylation of NR4A1 is necessary for SP/NK<sub>1</sub>R-induced autosis.

387

## 388 **Discussion**

389 NR4A receptors regulate multiple processes such as metabolism, proliferation, migration,  
390 apoptosis, DNA repair and autophagy. Accordingly, NR4A receptors are involved in  
391 several pathological processes like cardiovascular diseases, diabetes, atherosclerosis and  
392 neurodegeneration (40). Interestingly, NR4A1 expression is also induced by caloric  
393 restriction, and a reduction in expression of at least NR4A2 accompanies human aging (2).  
394 Since DNA damage accumulates with aging, perhaps the reduced expression of NR4A is  
395 a contributory factor. Intriguingly, in cancers from different origins, such as melanoma,  
396 breast, colon and pancreas, both pro- and anti-tumorigenic activities have been described  
397 for NR4A family proteins (7, 41). Indeed, pharmacological regulation of NR4A activity has  
398 been proposed to not only counteract aging, including cognitive decline (40), but also  
399 cancer and metabolic diseases. Therefore, understanding the mechanisms that regulate  
400 NR4A function is an active area of research.



401 SUMO modification affects numerous cellular processes overlapping with those  
402 described for NR4A1 function. Disruption of SUMOylation affects differentiation of cells  
403 representative of the three germ layers: endoderm, ectoderm and mesoderm (42).  
404 SUMOylation also affects DNA repair and stability, as it acts as a master organizer of  
405 protein complexes with functions in chromatin remodeling, double-strand break repair and  
406 ribosome biogenesis (36).

407 In the present work, we demonstrated that NR4A1 is SUMOylated during SP-  
408 induced autosis. Specific mutants of NR4A1 with reduced SUMOylation have decreased  
409 basal stability but yet responded to SP signaling increasing its stability, as well as its  
410 transcriptional activity. This latter effect could be due to additional SUMOylation sites of  
411 NR4A1 since there is still a weak SUMO signal in the triple mutant. A recent more  
412 comprehensive analysis including many SUMO substrates have shown that the E residue  
413 is preferred over D in the consensus motif (43), so there could be additional SUMOylation  
414 motifs in the NR4A1 sequence. Even though RNF4 can attach ubiquitin to SUMO-modified  
415 NR4A1 in response to signals such as PMA and target it for proteasomal degradation (26),  
416 the ubiquitination sites for basal NR4A1 degradation seem to be different to Lys 102, 558  
417 and 577, since when those residues were substituted by arginine the stability of TriMut  
418 was reduced. Clearly NR4A1 can have different ubiquitination sites in different cellular  
419 contexts. For example, during inflammation, ubiquitinated NR4A1 is not send to  
420 proteasomal degradation but functions as a label of damaged mitochondria, interacting  
421 with the autophagic receptor p62/SQSTM1 for their engulfment and elimination by  
422 mitophagy (44). Further experiments will be needed to understand the combinations of  
423 PTMs that regulate NR4A1 half-life, intracellular localization and interactors, which render  
424 specific functions in different contexts.

425 Finally, we show that the ability of NR4A1 to induce autosis is impaired when  
426 SUMOylation is reduced. Autosis could be triggered by specific molecular interactions of

427 SUMOylated NR4A1 in the cytoplasm or in the nucleus. Interestingly, NR4A1\_TriMut  
428 (NR4A1\_K102,558,577R) showed a nuclear localization in 98% of the cells. It is possible  
429 that SUMOylation in K558 is required for cytoplasmic NR4A1 localization, as K558 is part  
430 of the third nuclear export signal (LLGKLPELRTL) located in the LBD (45). Therefore,  
431 NR4A1\_TriMut's inability to induce autosis might relate to a reduction in a cytoplasmic  
432 function or an alteration in a NR4A1 transcriptionally-regulated pathway that induces  
433 autophagy. The present work encourage further experiments to underscore the molecular  
434 mechanisms by which NR4A1 and SUMOylation influence the induction of autosis, or by  
435 the repression of a target gene. This knowledge is particularly relevant, since NR4A1  
436 expression is also induced in response to ischemia (24) and kainic acid-triggered seizures  
437 (25), situations where Substance P mediates neuronal cell death. Screening for small  
438 molecules able to inhibit NR4A1 SUMOylation, or inducing its deSUMOylation, would  
439 potentially contribute to treatments that prevent or reduce neuronal cell death. From a  
440 different point of view, since both NR4A(4, 5) and SUMO (46) regulated pathways have  
441 functions in memory, SUMOylation of NR4A1 could have a role in cognitive activities.  
442 Altogether, understanding the molecular regulation of NR4A1 function has a potential  
443 impact in biomedicine.

444

#### 445 **Acknowledgements**

446 We acknowledge the technical assistance of M.C. Concepcion Valencia and Dr. Beatriz  
447 Aguilar, as well as the computational support from Ana María Escalante and Francisco  
448 Pérez and maintenance of equipment from Aurey Galván and Manuel Ortínez.

449

#### 450 **Declaration of interest**

451 Authors declare no conflict of interest

452

453 **Funding Information**

454 CONACyT CB2013-220515 and FC-921; PAPIIT/UNAM IN206015 and IN206518 to SCO.  
455 Collaboration between UNAM and Pontificia Universidad Católica de Chile was fostered by  
456 ICGEB MEX03/06 grant to SCO. CONACyT fellowship was awarded to GZG (255401) and  
457 GMH (588372).

458

459 **Author contribution**

460 GZG, GMH, MRSC, WVG, APPR and CA contributed to the investigation and formal  
461 analysis; MEA and LC contributed with resources and supervision; CW contributed to  
462 visualization; SCO contributed with conceptualization, funding acquisition, project  
463 administration, resources, supervision and writing original draft. All authors reviewed and  
464 edited the manuscript. Data in this work are part of GZG and GMH dissertation thesis in  
465 the “Posgrado en Ciencias Bioquímicas de la Universidad Nacional Autónoma de México”.  
466 WVG and APPR were undergrad students of Facultad de Ciencias, UNAM.

467

468 **References**

- 469 1. Kurakula K, Koenis DS, van Tiel CM, de Vries CJ. NR4A nuclear receptors are orphans but  
470 not lonesome. *Biochimica et biophysica acta*. 2014;1843(11):2543-55.
- 471 2. Oita RC, Mazzatti DJ, Lim FL, Powell JR, Merry BJ. Whole-genome microarray analysis  
472 identifies up-regulation of Nr4a nuclear receptors in muscle and liver from diet-restricted rats.  
473 *Mech Ageing Dev*. 2009;130(4):240-7.
- 474 3. Kanzleiter T, Wilks D, Preston E, Ye J, Frangioudakis G, Cooney GJ. Regulation of the  
475 nuclear hormone receptor nur77 in muscle: influence of exercise-activated pathways in vitro and  
476 obesity in vivo. *Biochim Biophys Acta*. 2009;1792(8):777-82.

- 477 4. Hawk JD, Bookout AL, Poplawski SG, Bridi M, Rao AJ, Sulewski ME, et al. NR4A nuclear  
478 receptors support memory enhancement by histone deacetylase inhibitors. *The Journal of clinical*  
479 *investigation*. 2012;122(10):3593-602.
- 480 5. Bridi MS, Abel T. The NR4A orphan nuclear receptors mediate transcription-dependent  
481 hippocampal synaptic plasticity. *Neurobiology of learning and memory*. 2013;105:151-8.
- 482 6. Malewicz M, Kadkhodaei B, Kee N, Volakakis N, Hellman U, Viktorsson K, et al. Essential  
483 role for DNA-PK-mediated phosphorylation of NR4A nuclear orphan receptors in DNA double-  
484 strand break repair. *Genes Dev*. 2011;25(19):2031-40.
- 485 7. Mohan HM, Aherne CM, Rogers AC, Baird AW, Winter DC, Murphy EP. Molecular  
486 pathways: the role of NR4A orphan nuclear receptors in cancer. *Clin Cancer Res*.  
487 2012;18(12):3223-8.
- 488 8. Zhang H, Baehrecke EH. Eaten alive: novel insights into autophagy from multicellular  
489 model systems. *Trends Cell Biol*. 2015;25(7):376-87.
- 490 9. Ponpuak M, Mandell MA, Kimura T, Chauhan S, Cleyrat C, Deretic V. Secretory  
491 autophagy. *Curr Opin Cell Biol*. 2015;35:106-16.
- 492 10. Wirawan E, Vanden Berghe T, Lippens S, Agostinis P, Vandenabeele P. Autophagy: for  
493 better or for worse. *Cell research*. 2012;22(1):43-61.
- 494 11. Castro-Obregon S, Del Rio G, Chen SF, Swanson RA, Frankowski H, Rao RV, et al. A  
495 ligand-receptor pair that triggers a non-apoptotic form of programmed cell death. *Cell Death Differ*.  
496 2002;9(8):807-17.
- 497 12. Castro-Obregon S, Rao RV, del Rio G, Chen SF, Poksay KS, Rabizadeh S, et al.  
498 Alternative, nonapoptotic programmed cell death: mediation by arrestin 2, ERK2, and Nur77. *J Biol*  
499 *Chem*. 2004;279(17):17543-53.
- 500 13. Bouzas-Rodriguez J, Zarraga-Granados G, Sanchez-Carbente Mdel R, Rodriguez-Valentin  
501 R, Gracida X, Anell-Rendon D, et al. The nuclear receptor NR4A1 induces a form of cell death  
502 dependent on autophagy in mammalian cells. *PLoS One*. 2012;7(10):e46422.

- 503 14. Wang WJ, Wang Y, Chen HZ, Xing YZ, Li FW, Zhang Q, et al. Orphan nuclear receptor  
504 TR3 acts in autophagic cell death via mitochondrial signaling pathway. *Nature chemical biology*.  
505 2014;10(2):133-40.
- 506 15. Pawlak A, Strzadala L, Kalas W. Non-genomic effects of the NR4A1/Nur77/TR3/NGFIB  
507 orphan nuclear receptor. *Steroids*. 2015;95:1-6.
- 508 16. Segala G, David M, de Medina P, Poirot MC, Serhan N, Vergez F, et al. Dendrogenin A  
509 drives LXR to trigger lethal autophagy in cancers. *Nat Commun*. 2017;8(1):1903.
- 510 17. Silvente-Poirot S, Segala G, Poirot MC, Poirot M. Ligand-dependent transcriptional  
511 induction of lethal autophagy: A new perspective for cancer treatment. *Autophagy*. 2018;14(3):555-  
512 7.
- 513 18. Godoi PH, Wilkie-Grantham RP, Hishiki A, Sano R, Matsuzawa Y, Yanagi H, et al. Orphan  
514 Nuclear Receptor NR4A1 Binds a Novel Protein Interaction Site on Anti-apoptotic B Cell  
515 Lymphoma Gene 2 Family Proteins. *J Biol Chem*. 2016;291(27):14072-84.
- 516 19. Qin H, Gao F, Wang Y, Huang B, Peng L, Mo B, et al. Nur77 promotes cigarette  
517 smoke-induced autophagic cell death by increasing the dissociation of Bcl2 from Beclin-1. *Int J Mol*  
518 *Med*. 2019;44(1):25-36.
- 519 20. Liu Y, Levine B. Autosis and autophagic cell death: the dark side of autophagy. *Cell Death*  
520 *Differ*. 2015;22(3):367-76.
- 521 21. Munoz M, Covenas R. Involvement of substance P and the NK-1 receptor in human  
522 pathology. *Amino acids*. 2014;46(7):1727-50.
- 523 22. Turner RJ, Vink R. The role of substance p in ischaemic brain injury. *Brain sciences*.  
524 2013;3(1):123-42.
- 525 23. Liu H, Cao Y, Basbaum AI, Mazarati AM, Sankar R, Wasterlain CG. Resistance to  
526 excitotoxin-induced seizures and neuronal death in mice lacking the preprotachykinin A gene. *Proc*  
527 *Natl Acad Sci U S A*. 1999;96(21):12096-101.

- 528 24. Walton M, Connor B, Lawlor P, Young D, Sirimanne E, Gluckman P, et al. Neuronal death  
529 and survival in two models of hypoxic-ischemic brain damage. *Brain Res Brain Res Rev.*  
530 1999;29(2-3):137-68.
- 531 25. Honkaniemi J, Sharp FR. Prolonged expression of zinc finger immediate-early gene mRNAs  
532 and decreased protein synthesis following kainic acid induced seizures. *Eur J Neurosci.*  
533 1999;11(1):10-7.
- 534 26. Zhang L, Xie F, Zhang J, Dijke PT, Zhou F. SUMO-triggered ubiquitination of NR4A1  
535 controls macrophage cell death. *Cell Death Differ.* 2017;24(9):1530-9.
- 536 27. Hay RT. SUMO: a history of modification. *Mol Cell.* 2005;18(1):1-12.
- 537 28. Wasik U, Filipek A. Non-nuclear function of sumoylated proteins. *Biochim Biophys Acta.*  
538 2014.
- 539 29. Hendriks IA, Vertegaal AC. A comprehensive compilation of SUMO proteomics. *Nat Rev*  
540 *Mol Cell Biol.* 2016;17(9):581-95.
- 541 30. Hay RT. Decoding the SUMO signal. *Biochem Soc Trans.* 2013;41(2):463-73.
- 542 31. Sperandio S, de Belle I, Bredesen DE. An alternative, non-apoptotic form of programmed  
543 cell death. *Proc Natl Acad Sci U S A.* 2000;97(26):14376-81.
- 544 32. Arredondo C, Orellana M, Vecchiola A, Pereira LA, Galdames L, Andres ME. PIASgamma  
545 enhanced SUMO-2 modification of Nurr1 activation-function-1 domain limits Nurr1 transcriptional  
546 synergy. *PLoS One.* 2013;8(1):e55035.
- 547 33. Saijo K, Winner B, Carson CT, Collier JG, Boyer L, Rosenfeld MG, et al. A Nurr1/CoREST  
548 pathway in microglia and astrocytes protects dopaminergic neurons from inflammation-induced  
549 death. *Cell.* 2009;137(1):47-59.
- 550 34. Gareau JR, Lima CD. The SUMO pathway: emerging mechanisms that shape specificity,  
551 conjugation and recognition. *Nat Rev Mol Cell Biol.* 2010;11(12):861-71.

- 552 35. Slagsvold HH, Ostvold AC, Fallgren AB, Paulsen RE. Nuclear receptor and apoptosis  
553 initiator NGFI-B is a substrate for kinase ERK2. *Biochem Biophys Res Commun.*  
554 2002;291(5):1146-50.
- 555 36. Raman N, Nayak A, Muller S. The SUMO system: a master organizer of nuclear protein  
556 assemblies. *Chromosoma.* 2013;122(6):475-85.
- 557 37. Wu WS, Xu ZX, Ran R, Meng F, Chang KS. Promyelocytic leukemia protein PML inhibits  
558 Nur77-mediated transcription through specific functional interactions. *Oncogene.*  
559 2002;21(24):3925-33.
- 560 38. Wingate AD, Arthur JS. Post-translational control of Nur77. *Biochem Soc Trans.*  
561 2006;34(Pt 6):1107-9.
- 562 39. Chiocca S. Viral control of the SUMO pathway: Gam1, a model system. *Biochem Soc*  
563 *Trans.* 2007;35(Pt 6):1419-21.
- 564 40. Paillasse MR, de Medina P. The NR4A nuclear receptors as potential targets for anti-aging  
565 interventions. *Medical hypotheses.* 2015;84(2):135-40.
- 566 41. Beard JA, Tenga A, Chen T. The interplay of NR4A receptors and the oncogene-tumor  
567 suppressor networks in cancer. *Cell Signal.* 2015;27(2):257-66.
- 568 42. Hannoun Z, Greenhough S, Jaffray E, Hay RT, Hay DC. Post-translational modification by  
569 SUMO. *Toxicology.* 2010;278(3):288-93.
- 570 43. Kerscher O, Felberbaum R, Hochstrasser M. Modification of proteins by ubiquitin and  
571 ubiquitin-like proteins. *Annu Rev Cell Dev Biol.* 2006;22:159-80.
- 572 44. Hu M, Luo Q, Alitongbieke G, Chong S, Xu C, Xie L, et al. Celastrol-Induced Nur77  
573 Interaction with TRAF2 Alleviates Inflammation by Promoting Mitochondrial Ubiquitination and  
574 Autophagy. *Mol Cell.* 2017;66(1):141-53 e6.
- 575 45. Katagiri Y, Takeda K, Yu ZX, Ferrans VJ, Ozato K, Guroff G. Modulation of retinoid  
576 signalling through NGF-induced nuclear export of NGFI-B. *Nat Cell Biol.* 2000;2(7):435-40.

577 46. Droescher M, Chaugule VK, Pichler A. SUMO rules: regulatory concepts and their  
578 implication in neurologic functions. *Neuromolecular Med.* 2013;15(4):639-60.

579

## 580 **Figure Legends**

581 **Figure 1. NR4A1 is SUMOylated.** **A**, *Protein sequence alignment of NR4A family*  
582 *members.* Two conserved SUMOylation consensus motifs among members (green  
583 squares) and three potential ERK phosphorylation consensus sites in NR4A1 (blue  
584 squares) are shown. K558 is conserved in NR4A2 and NR4A1. **B**, *NR4A1 is SUMOylated*  
585 *in response to SP.* Immunoprecipitation (IP) of NR4A1 from cells transfected with NK<sub>1</sub>R  
586 expression vector and exposed to SP for the indicated times, to detect by Western blot  
587 either SUMO1, SUMO2/3 or NR4A1. IgG from IP was detected by the secondary antibody.  
588 **C**, *Over-expression of myc-SUMO1 enhances the amount of NR4A1 conjugation to*  
589 *SUMO1 in response to SP.* Cells were transfected with NK<sub>1</sub>R and MYC-tagged SUMO1  
590 expression vectors (Myc-SUMO1) and exposed (+) or not (-) to SP for 3 hr. NR4A1 was  
591 immunoprecipitated and developed by Western blot to detect Myc tag or NR4A1. Tubulin  
592 was detected in whole extracts as a loading reference (Input). **D**, *Triple mutant*  
593 *NR4A1\_K102,558,577R (TriMut) has reduced SUMOylation.* Cells were transfected with  
594 expression vectors for HA tagged SUMO2, FLAG-NR4A1 wild type or FLAG-  
595 NR4A1\_TriMut, and NK<sub>1</sub>R to allow post-translational modifications in response to SP (+).  
596 Immunoprecipitation was performed with FLAG antibody (antiFLAG) or IgG as a control of  
597 irrelevant antibody. WB was developed with antibodies against indicated proteins.  
598 TUBULIN was detected as a loading reference (Input).

599

600 **Figure 2. NR4A1 SUMOylation depends on former phosphorylation.** **A**, *SUMOylation*  
601 *in K102, K558 and K577 is not necessary for NR4A1 phosphorylation in response to SP.*  
602 Cells were transfected with expression vectors for FLAG-NR4A1 wild type or FLAG-



603 NR4A1\_TriMut and NK<sub>1</sub>R, and exposed (+) or not (-) to SP for 3 hr. Total protein extracts  
604 were immunoprecipitated with anti-FLAG or IgG and the level of threonine phosphorylation  
605 was estimated by WB. TUBULIN was detected for comparison of total protein extraction  
606 for IP, and FLAG to show the level of expression of each construct. **B**, *Phosphorylation in*  
607 *T143 is necessary for NR4A1 SUMOylation in response to SP*. Cells were transfected with  
608 expression vectors for FLAG-NR4A1 wild type or FLAG-NR4A1\_T143A, HA-SUMO2 and  
609 NK<sub>1</sub>R, and exposed (+) or not (-) to SP for 3 hr. Total protein extracts were  
610 immunoprecipitated with anti-FLAG and the level of SUMOylation was estimated by WB  
611 detecting HA. FLAG was detected to show the level of expression of NR4A1 constructs. **C**,  
612 *NR4A1 peak of synthesis is at 3 hr after SP addition and has a half-life of less than three*  
613 *hours*. Lanes 1-6, total protein extracts were obtained from cells transfected with NK<sub>1</sub>R  
614 and exposed to SP for the indicated times. Lanes 7-12, total protein extracts were  
615 obtained from cells transfected with NK<sub>1</sub>R expression vector, treated for 3 hr with SP to  
616 reach maximum expression of NR4A1 (considered time 0 for cycloheximide treatment),  
617 and then exposed to cycloheximide (CHX) for the indicated time to inhibit new protein  
618 synthesis. Three hr after CHX less than half of the initial amount of NR4A1 protein  
619 remains. **D**, *NR4A1 basal stability is enhanced by SUMOylation, but TriMut still becomes*  
620 *stabilized in response to SP signaling*. To compare stability of NR4A1 wild type with  
621 NR4A1\_TriMut, cells were transfected with expression vectors for NK<sub>1</sub>R and either FLAG-  
622 NR4A1 or FLAG-NR4A1\_TriMut. 24 hr after of transfection cells were treated with CHX for  
623 the indicated times, or treated for 3 hr with SP and then with CHX for the indicated time.  
624 Clearly, the amount of FLAG-NR4A1\_TriMut was reduced and was degraded faster than  
625 wild type, but yet responded to SP induction. **E**. Quantitative comparison of the  
626 degradation rate of NR4A1 WT and TriMut, with or without SP, from densitometric analysis  
627 of at least three independent experiments described in **D**. Each blot was normalized with  
628 their corresponding TUBULIN. The measurement obtained for each NR4A1 (WT or TriMut)

629 before CHX treatment (time zero) was arbitrary considered 100 units. Notice that the faster  
630 degradation rate of TriMut is overcome in response to SP. Each dot represents the mean  
631 and bars represent standard deviation.

632

633 **Figure 3. SUMOylation regulates NR4A1 transcriptional activity and its intracellular**  
634 **distribution. A, NR4A1 mutant in Lys residues located in SUMOylation motifs (TriMut)**  
635 *have increased transcriptional activity compared to wild type in response to SP.* Cells were  
636 transfected with a reporter containing Luciferase cDNA under the control of NuRE/POMC  
637 and the indicated plasmids to assess basal transcriptional activity (left panel). Then cells  
638 were co- transfected with NK<sub>1</sub>R and treated or not with SP for 3 hr. TriMut showed  
639 enhanced transcriptional activity in response to SP and at a higher level than NR4A1 WT.  
640 A mean of 5 independent experiments (each with duplicate wells) is plotted. Error bars  
641 represent the standard error. \*\* p<0.01; n=5. A representative Western blot showing the  
642 level of expression of each construct, with or without SP, is shown below. Both anti-FLAG  
643 and anti-Tubulin were incubated simultaneously. **B, SUMOylation and phosphorylation**  
644 *regulate NR4A1 intracellular distribution.* Cells were transfected with indicated plasmids  
645 and the intracellular localization of the proteins was determined by immunofluorescence to  
646 detect NR4A1 (green). Two-hundred cells from two independent experiments for each  
647 construct were counted. The percentage of cells with only nuclear, or nuclear-cytoplasmic  
648 localization of NR4A1, is plotted. Representative confocal microscopy images are shown  
649 below; nuclei were stained with DAPI (blue).

650

651 **Figure 4. NR4A1 SUMOylation is necessary for SP-induced autosis. A, The viral**  
652 *protein Gam1 reduced SUMOylation of NR4A1.* Cells were transfected with NK<sub>1</sub>R  
653 expression vector and the indicated plasmids, and were treated or not with SP for 3 hr.  
654 Then, NR4A1 was immunoprecipitated and developed with anti-SUMO2/3 or antiNR4A1.

655 Notice that only in the presence of GAM1, and not with inactive mutant GAM1, there was a  
656 reduction in SUMOylated NR4A1. GAPDH was detected in total extract (input) as a  
657 reference of initial similar amount of protein. **B**, *Inhibiting SUMOylation by the expression*  
658 *of the viral protein GAM1 prevents SP-induced autosis*. Cells were transfected with NK<sub>1</sub>R  
659 expression vector and an empty vector or *Gam1* expression vector and treated or not with  
660 SP for 24 hr. Cell death was estimated by Trypan blue exclusion. A mean of three  
661 independent experiments is plotted. Error bars represent the standard deviation. \*\*\*  
662  $p < 0.0001$  2way ANOVA. The Western blot below shows the expression of *Myc-Gam1* or  
663 *Myc-Gam mutant*. **C**, *SUMOylation defective mutant (TriMut) is not able to induce autosis*  
664 *in response to SP*. Cells were co-transfected with NK1R expression vector and either  
665 NR4A1 WT, TriMut or empty vector as indicated. Cells were also transfected with a control  
666 siRNA targeting a viral sequence not present in mammals or a siRNA targeting the 3' UTR,  
667 only present in endogenous mRNA. Cells were exposed or not to SP for 24 hr and cell  
668 death was estimated by Trypan blue exclusion or LDH activity released. Every experiment  
669 was performed in triplicate and averaged. The mean of three independent experiments is  
670 plotted. Error bars represent the standard deviation. \*\*\*,  $p < 0.0001$ . Total protein extracts  
671 were obtained from replica wells taken at 3hr after SP addition to estimate the content of  
672 NR4A1 by WB. Tubulin was detected as a loading reference.

**A.**

NR4A2 1 MPCVQAQYGGSSPQGASPASQSYSHSSGEYSSDFLTPEFVKFSMDLTNTEITAT--TSLPSFSTFMDNYSTGYD-----VKPPCLYQMP-----LS 84  
 NR4A3 1 MPCVQAQYSPSPPGSSYAAQTYS----SEYTTTEIMNPDYTKLTMDLGSTEITATATTSLSISTFVEGYSSNYE-----LKPSCVYQMQRPLIKVEE 88  
 NR4A1 1 MPCIQAQYGTAPSPGPR-----DHLASDPLTPEFIKPTMDLASPEAAPAAPTALPSFSTFMDGYTGEFDTFLYQLPGTVQPCSSASSASSTSS 91

NR4A2 GQQS----SIKVEDIQMHNYQQHSHLPPQSEEMMPHSG-----SVYYKPSPTPTTPGFQVQHSPMWDD--PGSLHNFHQNYVAT---THMIEQR 166  
 NR4A3 GRAP----SYHHHHHHHHHHHHHHHHHHHHHHHHHHHHHHHHHHHHHHHHHHHHHHHHHHHHHHHHHHHHHHHHHHHHHHHHHHHHHHHHHHHHHHHHHH 181  
 NR4A1 SATSPASASFKFEDFQVYGCYPGPLSGPVDEALSSSGS-----DYYGSPCSAPSPSTPSFQPPQLSPWDG----SFGHFSPSQTYEGLRAWTEQLP 178  
 K102

NR4A2 KTPVSRLSLFSFKQSPPGTPVSS----CQMRFD----GPLHVPMNPEPAGSHHVVDGQTFVNPPIRKPAS-MGFPGQLQIG---HASQLLDT--QVPSPP 252  
 NR4A3 TVAGARFPLFHFVKPSPPHPPAPSPAGGHHLGYDPTAAAALSLPLGAAAAAGSQAAALESHPYGLPLAKRAAPLAFPPPLGLTPSPTASSLLGESPSLPSPP 281  
 NR4A1 KASGPPQPPAFFSFSPTGSPS-----LAQSPLKLFPSQAT-HQLGEGESYSMPTAFPGLAP----TSEHLE----GSGILDTPVTSTKAR 256

NR4A2 548 RPNYLSKLLGKLPPELRTLCTQGLQRIFYLKLEDLVPPPAIIDKFLDLTLPF 597  
 NR4A3 576 LEPTESKVLGALVELRKICTLGLQRIFYLKLEDLVSPPSIIDKFLDLTLPF 575  
 NR4A1 548 PASCLSRLLGKLPPELRTLCTQGLQRIFYLKLEDLVPPPPPIIDKIFMDTLPF 597

ERK phosphorylation consensus (Px(S7T)P)  
 SUMOylation consensus motif (ΨKXE)

K558 K577

**B.**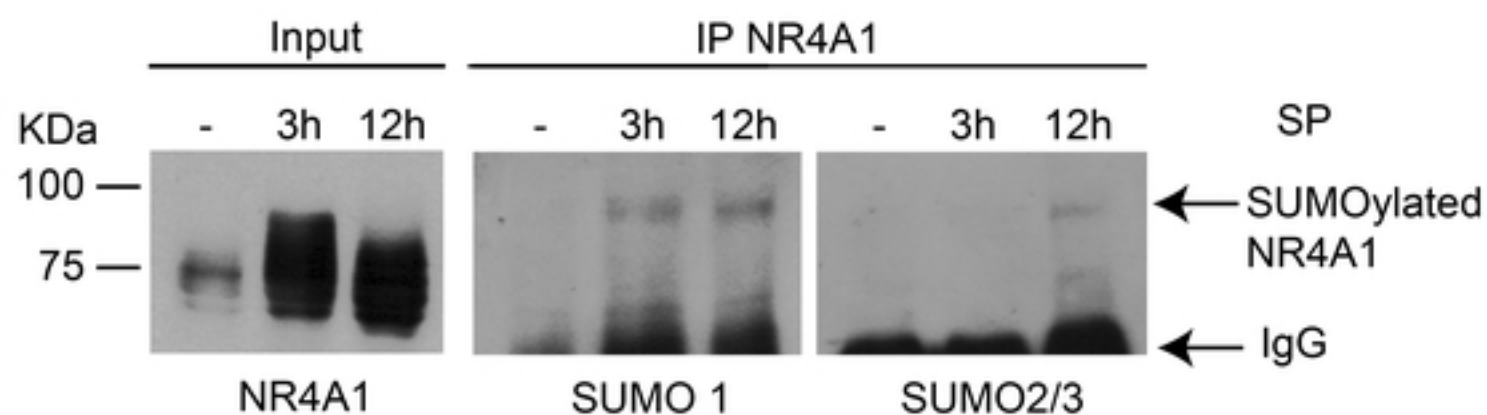**C.**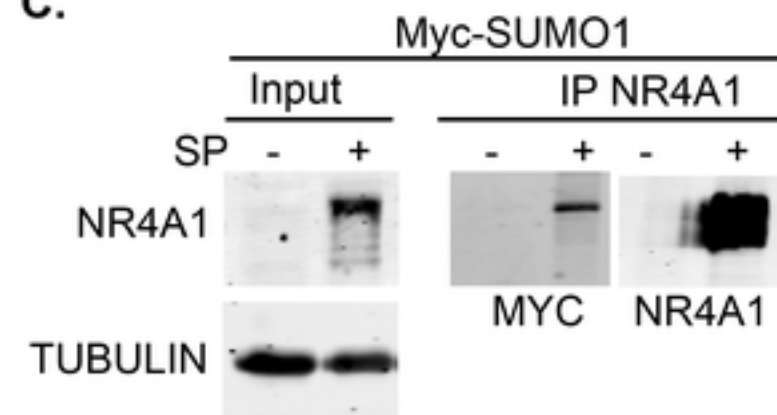**D.**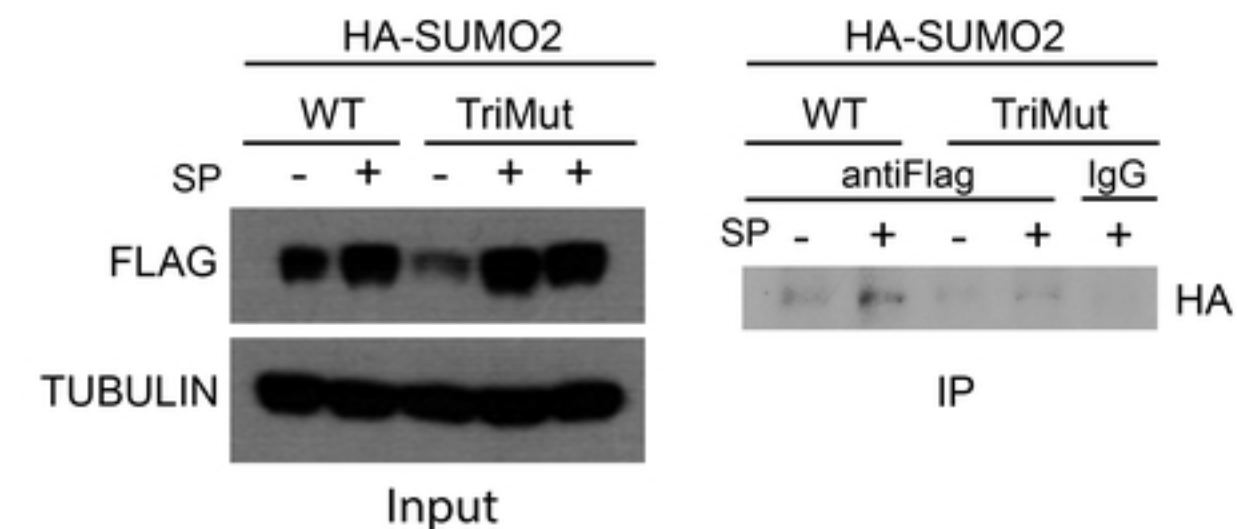

Figure 1

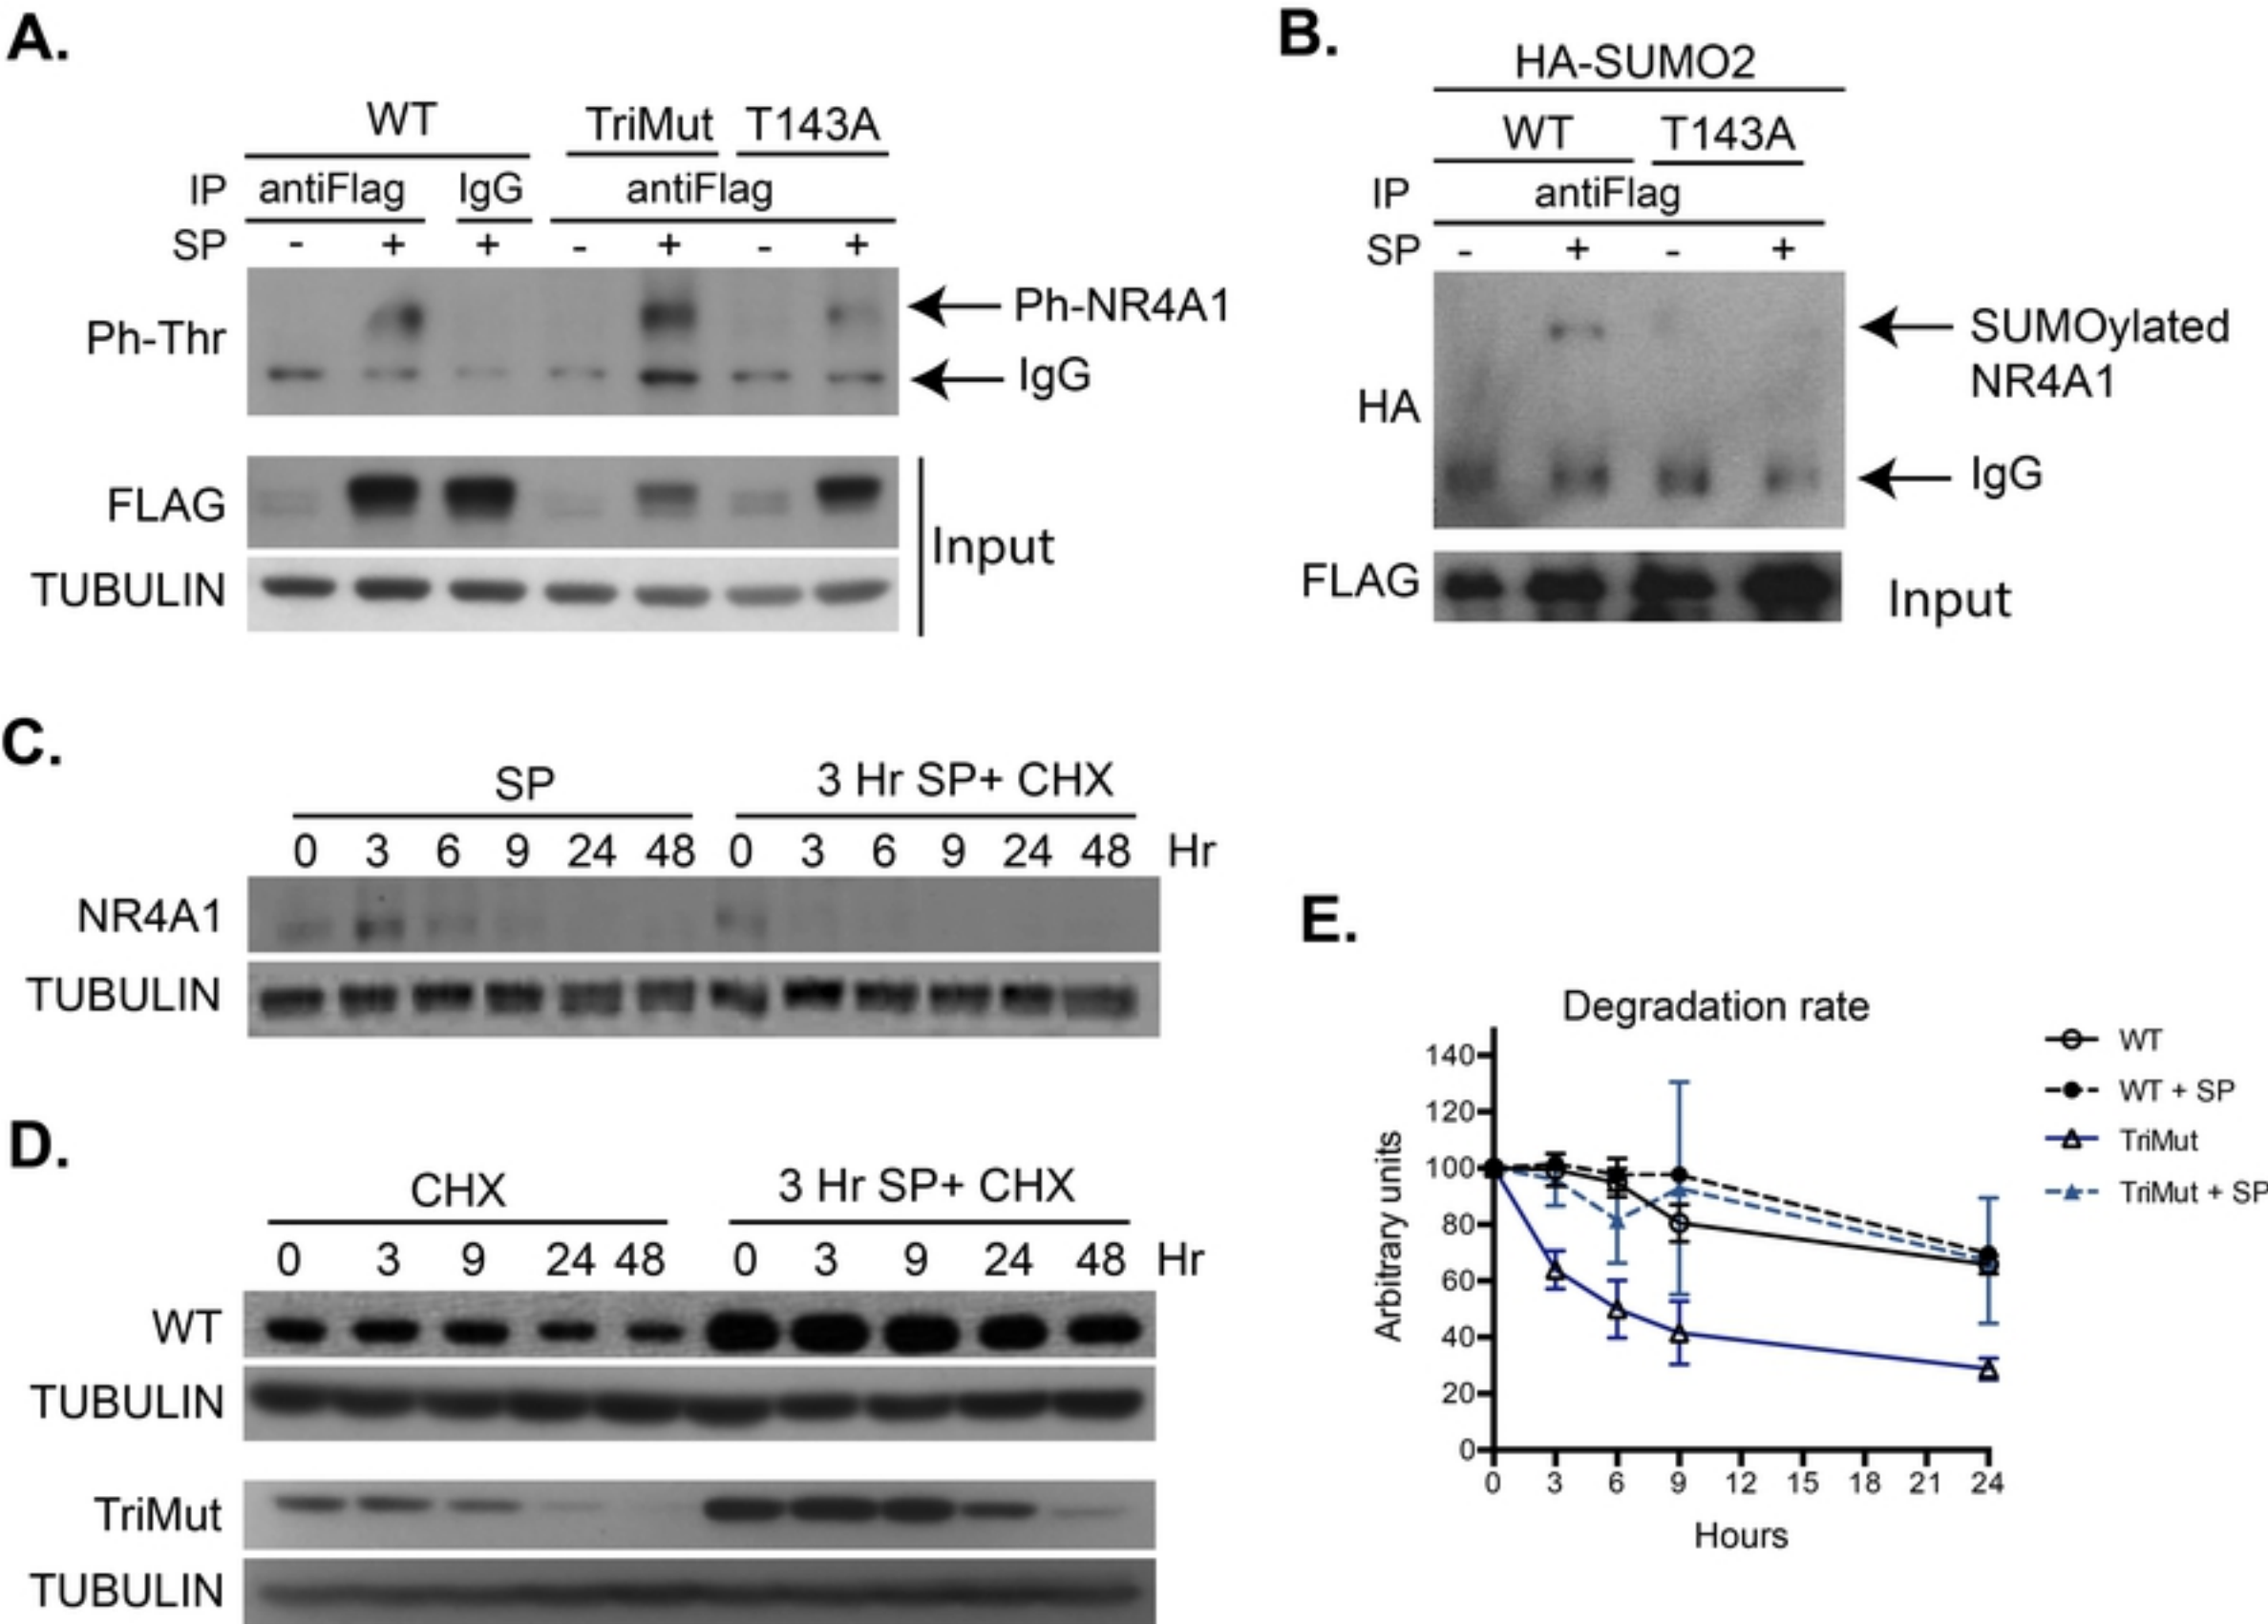

Figure 2

**A.**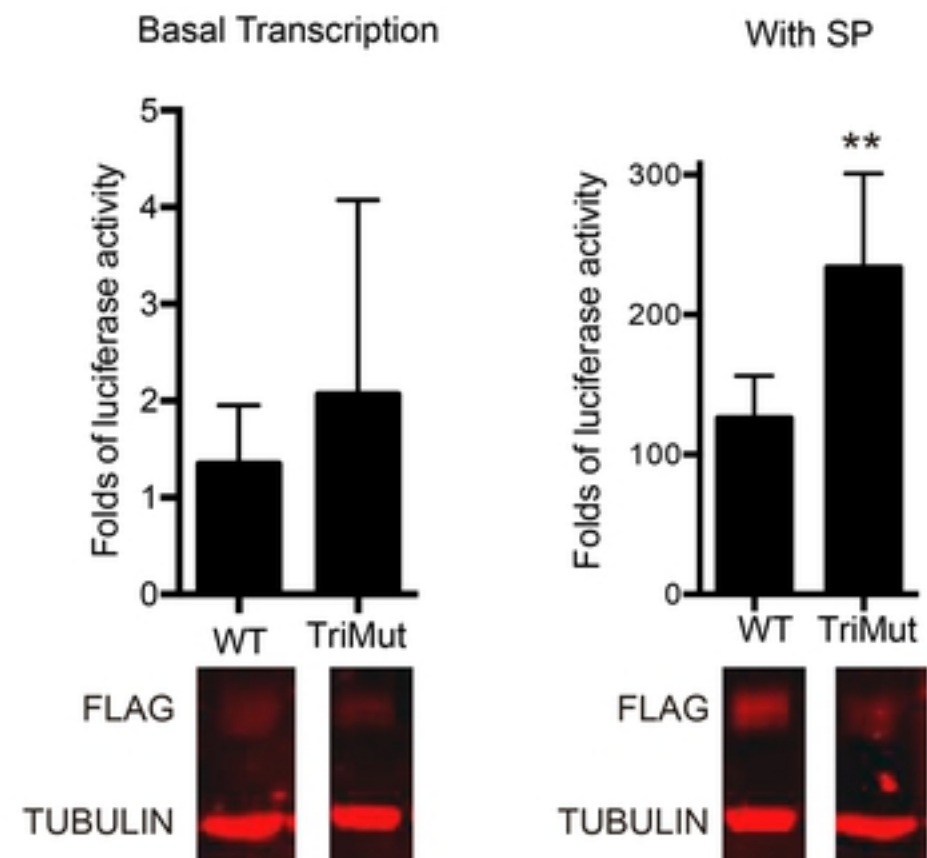**B.**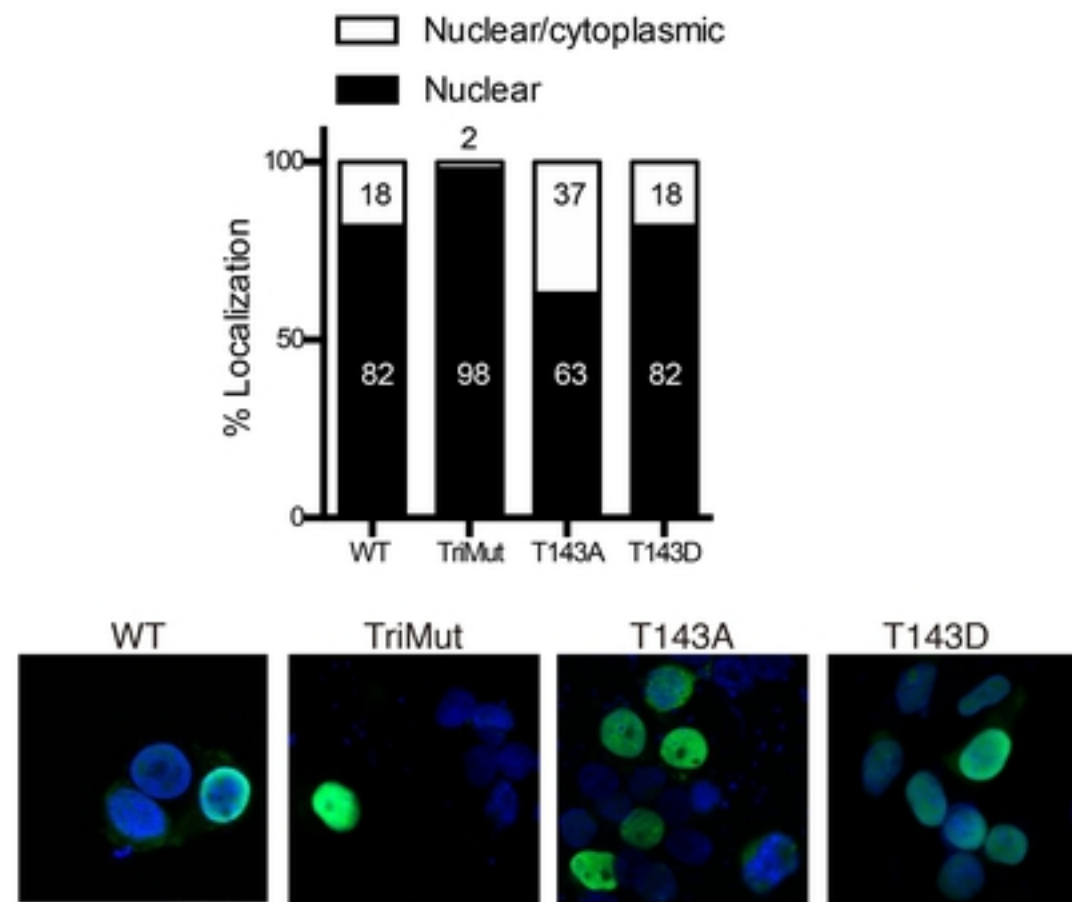

Figure 3

**A.****Gam1 Inhibits NR4A1 SUMOylation**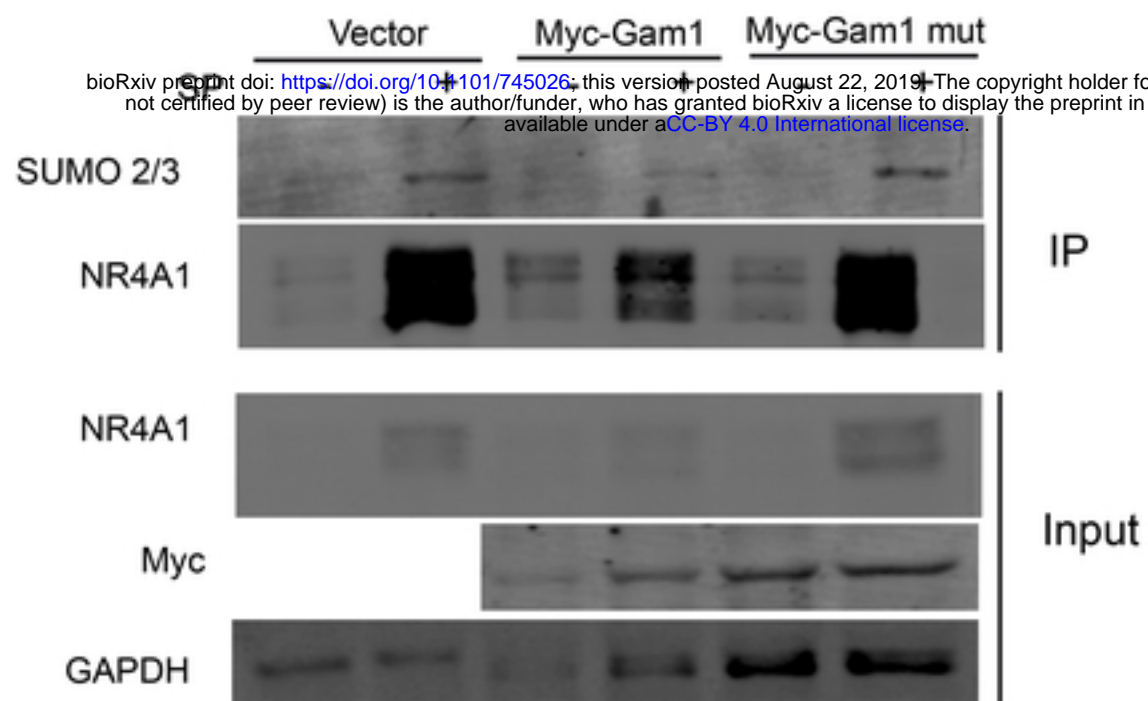**B.****Gam1 Inhibits Cell Death**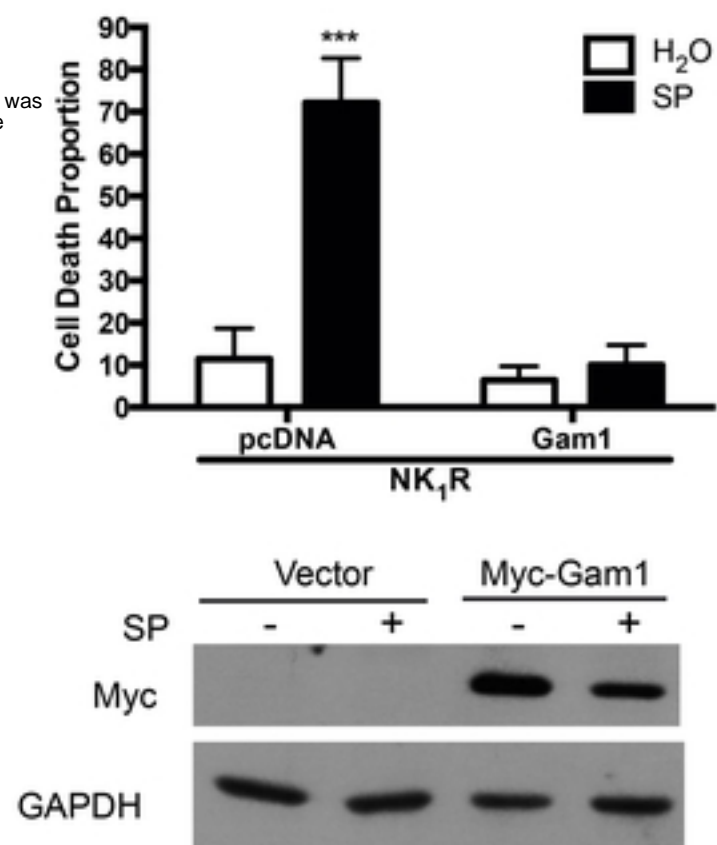**C.**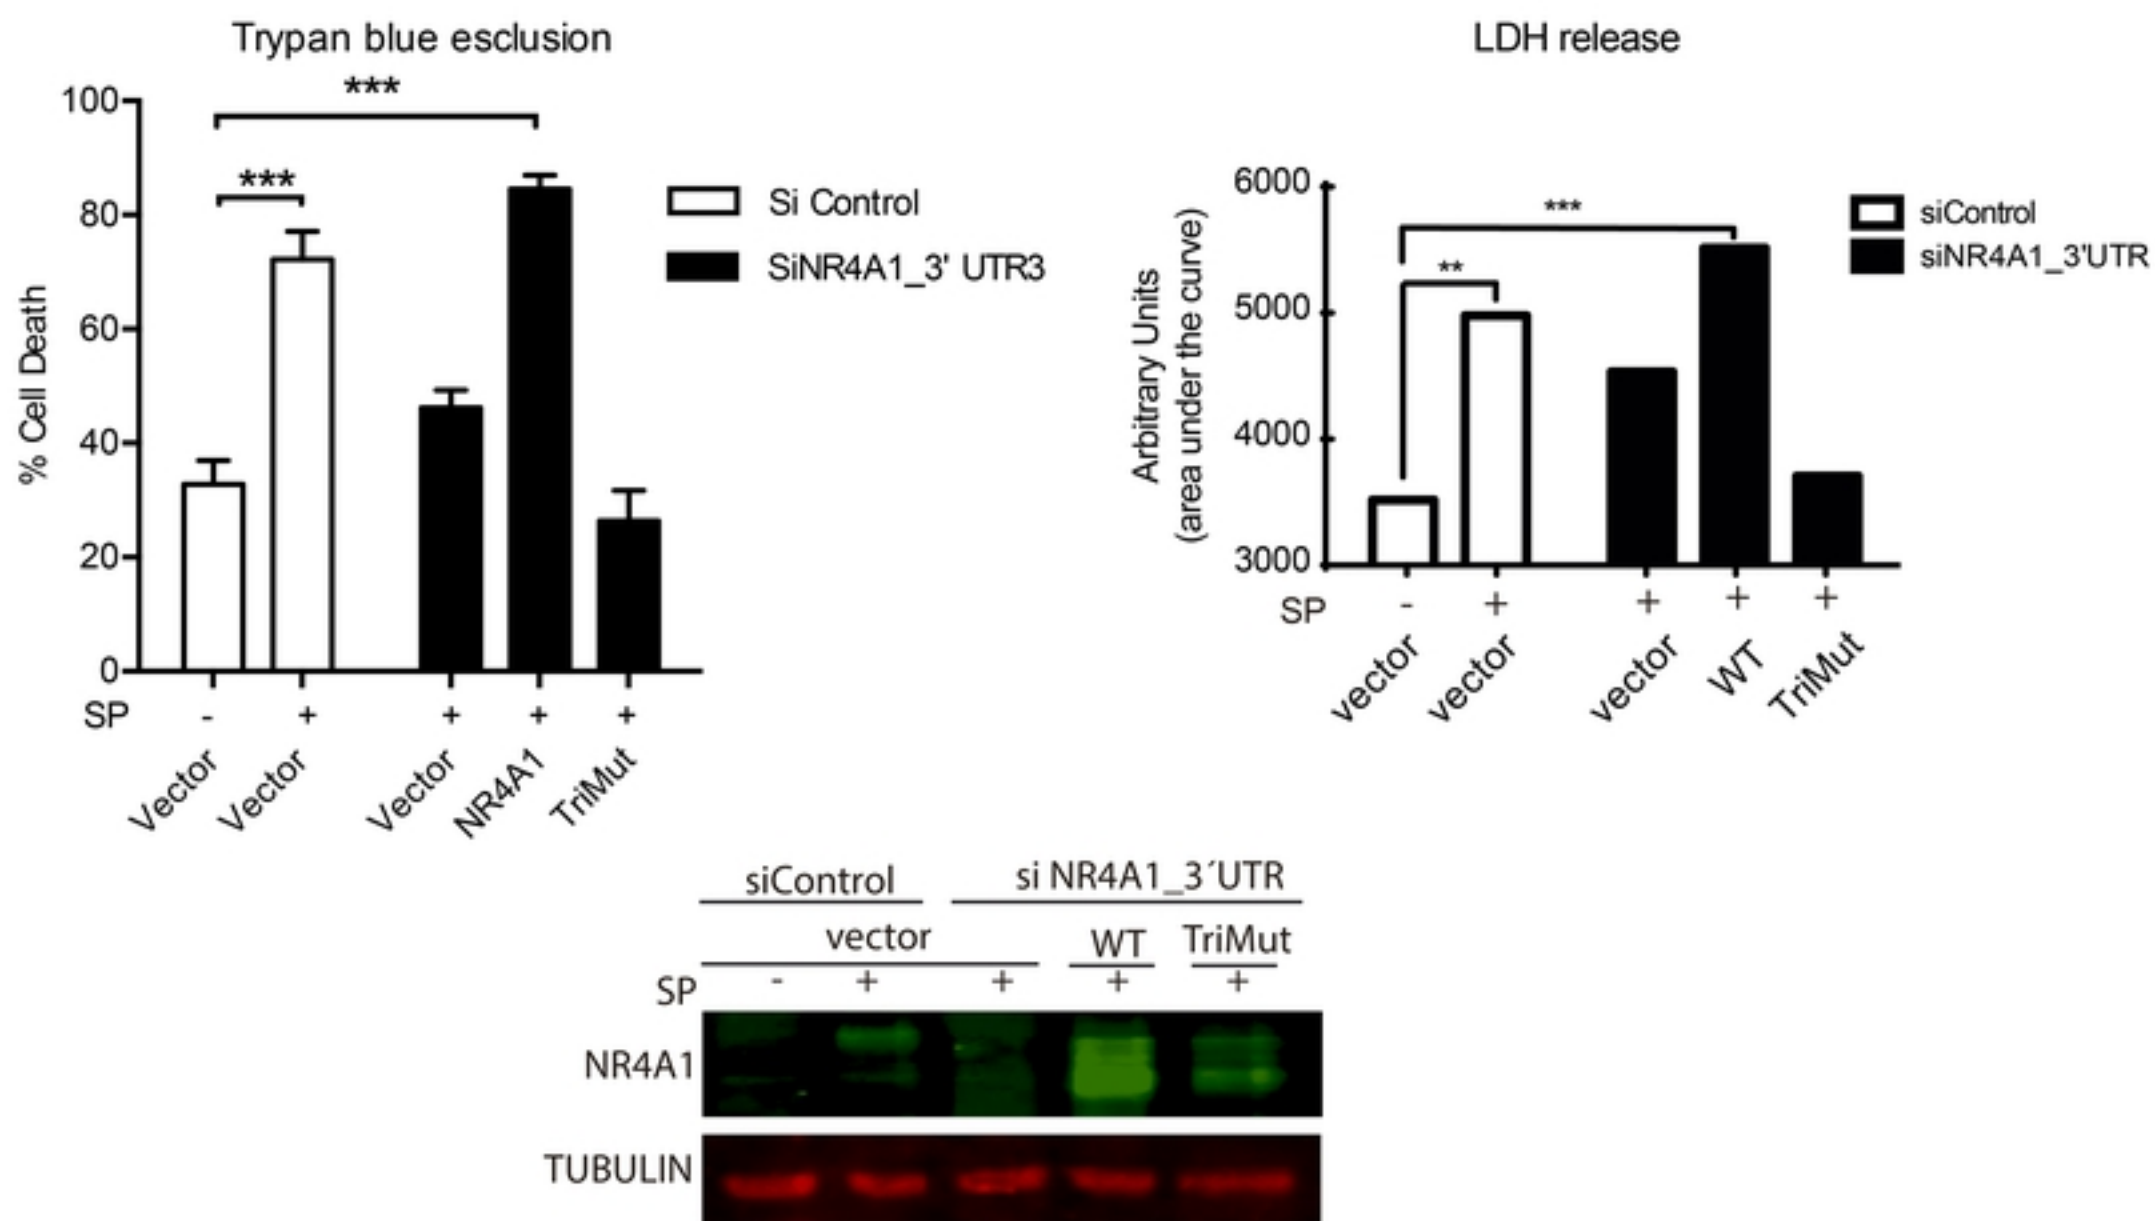

Figure 4
